1 **Targeted reduction of airborne viral transmission risk in residential aged care**

2

3 Amanda Brass<sup>1,2</sup>, Andrew P Shoubridge<sup>1,2</sup>, Nicolas Larby<sup>3</sup>, Levi Elms<sup>1,2</sup>, Sarah K Sims<sup>1,2</sup>,  
4 Erin Flynn<sup>1,2,4</sup>, Caroline Miller<sup>1,5</sup>, Maria Crotty<sup>6,7</sup>, Lito E Papanicolas<sup>1,2,8</sup>, Steve L  
5 Wesselingh<sup>1</sup>, Lidia Morawska<sup>9</sup>, Scott C Bell<sup>10,11</sup>, Steven L Taylor<sup>1,2,\*</sup>, Geraint B Rogers<sup>1,2,\*</sup>

6

7 <sup>1</sup>The South Australian Health and Medical Research Institute, Adelaide, South Australia,  
8 Australia

9 <sup>2</sup>The Microbiome and Host Health Programme, College of Medicine and Public Health,  
10 Flinders University, Bedford Park, South Australia, Australia

11 <sup>3</sup>Aged Care Property Services Management, South Australia, Australia

12 <sup>4</sup>National Centre for Epidemiology & Population Health, The Australian National University,  
13 Canberra, Australian Capital Territory, Australia

14 <sup>5</sup>School of Public Health, University of Adelaide, Adelaide, South Australia, Australia

15 <sup>6</sup>College of Medicine and Public Health, Flinders University, Adelaide, South Australia,  
16 Australia

17 <sup>7</sup>Southern Adelaide Local Health Network, SA Health, Adelaide, South Australia, Australia

18 <sup>8</sup>SA Pathology, SA Health, Adelaide, South Australia, Australia

19 <sup>9</sup>International Laboratory for Air Quality and Health, Queensland University of Technology,  
20 Queensland, Australia

21 <sup>10</sup>The Prince Charles Hospital, Brisbane, Queensland, Australia

22 <sup>11</sup>Child Health Research Centre, Faculty of Medicine, The University of Queensland,  
23 Brisbane, Queensland, Australia

24 \* Joint senior

25

26 Correspondence:

27 Name: Dr. Steven L Taylor

28 Email: [steven.taylor@sahmri.com](mailto:steven.taylor@sahmri.com)

29 Phone: +61 (08) 8204 5711.

30 Address: 5D332, Flinders Medical Centre, Flinders Drive, Bedford Park, South Australia,

31 5042, Australia

32 **Keywords:** Ventilation, airborne transmission, aged care, COVID-19

33 **Abstract**

34 COVID-19 has demonstrated the devastating consequences of the rapid spread of an airborne  
35 virus in residential aged care. We report the use of CO<sub>2</sub>-based ventilation assessment to  
36 empirically identify potential “super-spreader” zones within an aged care facility, and  
37 determine the efficacy of rapidly implemented, inexpensive, risk reduction measures.

38 **Main Text**

39 Outbreaks of COVID-19 in residential aged care facilities (RACF) have proven devastating.  
40 The combination of high transmission rates and resident vulnerability has led to rates of  
41 mortality that are higher than any other setting, including acute care hospital facilities [1]. In  
42 response, aged care providers and public health authorities have enacted measures to reduce  
43 the risk of SARS-CoV-2 exposure to prevent transmission within facilities. These measures  
44 include social distancing, reduced visitation by family members (site lockdowns), the  
45 wearing of personal protective equipment (PPE) by staff and visitors, and isolation of those  
46 with active infection. The impact of these measures on the well-being and quality-of-life of  
47 residents, more than half of whom have reduced cognitive ability or dementia [2], has been  
48 considerable [3]. The need to identify less disruptive measures to protect RACF populations  
49 from airborne viral transmission (including respiratory viruses other than SARS-CoV-2) is  
50 urgent.

51 Current strategies to reduce rates of indoor viral transmission can be placed into two broad  
52 categories; 1) those that reduce the susceptible occupant population, including occupancy  
53 limits, vaccination programs, and PPE use, and 2) those that prevent the accumulation of  
54 viable viral particles within the circulating air of an RACF environment [4]. This latter group  
55 of measures is more effective as it doesn’t require any behaviour changes to staff or visitors.  
56 It also offers long-term advantages by avoiding the need to place additional burden on facility  
57 residents and staff, or the need to limit access to facilities by family members. Several

58 strategies to reduce the build-up of viable viral particles can be employed, including the use  
59 of high-efficiency particulate absorbing (HEPA) air-filtration, or ultraviolet C (UVC)  
60 disinfection devices [3,4]. However, most effective approach is arguably to remove viral  
61 particles through increased ventilation [5].

62 Outdoor venues are associated with a low relative risk for airborne viral transmission due to  
63 the rapid clearance of virus-containing airborne particles through natural air movement.  
64 Indoor spaces, where air exchange is considerably reduced, are estimated to have a SARS-  
65 CoV-2 transmission risk that is more than 18 times higher [6]. Increasing rates of air  
66 exchange within the built environment would reduce this transmission risk substantially. The  
67 principal reason that this strategy has not been employed widely is the considerable costs  
68 associated with heating or cooling external air [7]. Instead, many facilities, including RACFs,  
69 typically employ high rates of air recirculation, inadvertently resulting in recirculation of the  
70 virus as well [5].

71 Increasing ventilation within facilities that house vulnerable populations has been advocated  
72 widely during the COVID-19 pandemic [8]. However, implementation of ventilation  
73 measures has been limited. The ability to target increases in air exchange to those zones  
74 within facilities that carry the highest transmission risk would greatly increase the financial  
75 feasibility of improving ventilation. Here we report the use of a rapid, low-cost, strategy to  
76 empirically identify potential “super-spreader” zones within an RACF, and the efficacy of the  
77 targeted ventilation-based risk reduction measures that were deployed in response.

78 While atmospheric CO<sub>2</sub> levels remain relatively constant, indoor CO<sub>2</sub> levels increase as a  
79 result of human respiration. Elevated CO<sub>2</sub> levels have been used widely as a marker of indoor  
80 air quality and, relative to occupancy, a measure of air exchange and ventilation efficiency.  
81 Indeed, such measures correlate strongly with infectious disease outcomes, such as  
82 absenteeism due to acute respiratory infection [9]. CO<sub>2</sub> levels can be determined accurately

83 using inexpensive monitors, allowing for high transmission risk zones within facilities to be  
84 identified rapidly and mitigation strategies to be enacted. We used 62 wall-mounted  
85 remotely-monitored CO<sub>2</sub> sensors (Aranet4 Pro Sensors, Radical, Australia) to monitor CO<sub>2</sub>  
86 levels over a four-week period within a two-storey 110-bed RACF in Australia. During this  
87 period, all staff and visitors to the RACF were required to wear N95 face masks (or  
88 equivalent), goggles or face shield, and be vaccinated against COVID-19. Deployment of  
89 CO<sub>2</sub> monitors covered the majority of accessible sites within the facility, including “back of  
90 house” areas used by staff only (n=17) and mixed communal areas used by both staff and  
91 residents (n=45). The zones employed a range of heating, ventilation, and air-conditioning  
92 (HVAC) systems, including evaporative cooling with 100% fresh ducted air, refrigerated  
93 reverse cycle ducted air, refrigerated reverse cycle split system, and exhaust air. Each monitor  
94 also captured temperature, humidity, and pressure, enabling data normalisation.

95 Over the course of the survey period, none of the 45 mixed zones showed indications of poor  
96 ventilation, with the highest peak CO<sub>2</sub> concentration being 830 ppm, which was in the  
97 resident dining room during the lunch period. However, of the 17 assessed back of house  
98 zones, which were only accessible to staff, 3 were identified as high transmission risk based  
99 on CO<sub>2</sub> levels exceeding 1000 ppm for a period of 15 min or more (levels logged at 60  
100 second intervals). These included one of the two staff lunch rooms and two of the three staff  
101 meeting rooms (**Figure 1A**). Interventions were identified based on the zone usage, the  
102 HVAC modality employed, and the ability to achieve improved ventilation rapidly and at low  
103 relative cost.

104 *High risk zone 1:* The staff lunch room had a floor area of 19 m<sup>2</sup> with a refrigerated reverse  
105 cycle split system HVAC. Despite room density restrictions of 1 person per 4 m<sup>2</sup>, high,  
106 regular, and prolonged CO<sub>2</sub> peaks were identified in the lunch room corresponding to meal  
107 breaks (**Supplementary Figure 1**). Of note, staff were not masked while eating and CO<sub>2</sub>

108 levels did not return to baseline levels for several hours after these peak periods. To quantify  
109 room ventilation, a subsequent CO<sub>2</sub> decay curve was generated over a 6-hour period, during  
110 which the staff lunch room was not occupied. The resulting air changes per hour (ACH) was  
111 0.65 (**Figure 1B**), which is 10-fold lower than the Australian Standards for ventilation in a  
112 healthcare setting [10]. Discussion with the facility's environmental management team  
113 identified that installation of an extraction fan at a cost of \$3400 AUD would effectively  
114 ventilate the room. The fan was set to extract air at 100 L/s and connected to a room sensor  
115 allowing usage to be limited to times of room occupancy. Retesting ventilation by CO<sub>2</sub> decay  
116 curve after extraction fan installation yielded an improved ACH of 5.30 (**Figure 1B**).  
117 Ongoing running costs of the extraction fan were calculated by an AC current and voltage  
118 data logger to be \$40.20 AUD per year.

119 *High risk zones 2 and 3:* Two staff meeting rooms also had CO<sub>2</sub> peaks indicative of high  
120 transmission risk. The first room had a floor area of 50 m<sup>2</sup> and a refrigerated reverse cycle  
121 ducted air system controlled by a remote control. CO<sub>2</sub> peaks in this room were less frequent  
122 than the staff lunch room, with a total of two peaks over 1000 ppm during the survey period.  
123 It was noted by facility management that the HVAC was rarely switched on during meetings,  
124 potentially explaining these CO<sub>2</sub> peaks. Intervention strategies were therefore minimal, with  
125 the HVAC system programming adjusted to automatically turn on during times when the  
126 room is in use. The second room had a floor area of 20 m<sup>2</sup> and a refrigerated reverse cycle  
127 split system HVAC. Like the first meeting room, a total of two peaks above 1000 ppm were  
128 recorded in this room during the survey period. However, unlike the first meeting room,  
129 existing HVAC could not be easily modified to improve ventilation. Interim protocols were  
130 therefore implemented, continuing a mandated mask use and room density limit for staff  
131 using this room.

132 Globally, the COVID-19 pandemic has again underlined the vulnerability of those living in  
133 residential aged care to airborne transmission of viral infections. In addition to COVID-19,  
134 seasonal respiratory viruses, including seasonal influenza and respiratory syncytial virus  
135 (RSV) represent a major cause of morbidity and mortality for residents [11]. Indeed,  
136 following a period of reduced exposure, the seasonal influenza peaks in 2022 are predicted to  
137 pose a significant health threat, as seen in the 2021-2022 winter in the Northern Hemisphere  
138 [12]. Targeting effective risk reduction measures to areas that are likely to contribute  
139 disproportionately viral spread could provide considerable protection.

140 In our analysis, passive and simulated CO<sub>2</sub> levels were used to identify high transmission risk  
141 zones. Such approaches are simple and readily deployable, however do not account for other  
142 factors affecting transmission risk, such as PPE and level of interaction [13]. CO<sub>2</sub> peaks were  
143 also based on levels recommended by The American Society of Heating, Refrigerating and  
144 Air-Conditioning Engineers (ASHRAE) of less than 600 ppm above outdoor concentrations  
145 (approximately, 420 ppm) [14]. The recommendation of these thresholds is based on  
146 consideration of a number of factors, including comfort. Alignment of target levels more  
147 closely with empirically assessed viral transmission rates would enable further protocol  
148 refinements.

149 The approach we describe has the potential to be applied beyond aged care. Rapid, targeted,  
150 improvements in air quality management, based on empirical facility surveys, could  
151 substantially reduce airborne pathogen transmission in other high-risk contexts, and warrant  
152 consideration in settings such as detention facilities, hospitals, or schools.

### 153 **Competing interests**

154 The authors declare that they have no competing interests.

155 **Funding**

156 This study was funded through the Australian Medical Research Future Fund (GNT2005904).

157 SLT is supported by an NHMRC Emerging Leader Fellowship (GNT1195421). GBR is

158 supported by an NHMRC Senior Research Fellowship (GNT1155179) and a Matthew

159 Flinders Professorial Fellowship. CM is supported by an NHMRC Emerging Leader

160 Fellowship (GNT1195421).



161 **REFERENCES**

- 162 1. United Nations. Policy Brief: The Impact of COVID-19 on older persons, May 2020, p 3.  
163 Available at: [https://unsdg.un.org/sites/default/files/2020-05/Policy-Brief-The-Impact-of-  
COVID-19-on-Older-Persons.pdf](https://unsdg.un.org/sites/default/files/2020-05/Policy-Brief-The-Impact-of-<br/>164 COVID-19-on-Older-Persons.pdf), Accessed 11 May 2022.
- 165 2. Australian Institute of Health and Welfare. Dementia in Australia. Available at:  
166 [https://www.aihw.gov.au/reports/dementia/dementia-in-aus/contents/population-health-  
impacts-of-dementia/prevalence-of-dementia](https://www.aihw.gov.au/reports/dementia/dementia-in-aus/contents/population-health-<br/>167 impacts-of-dementia/prevalence-of-dementia), Accessed 11 May 2022.
- 168 3. Royal Commission. Aged care and COVID-19: a special report. Available at:  
169 [https://agedcare.royalcommission.gov.au/publications/aged-care-and-covid-19-special-  
report](https://agedcare.royalcommission.gov.au/publications/aged-care-and-covid-19-special-<br/>170 report), , Accessed 11 May 2022.
- 171 4. Brass A, Shoubridge AP, Crotty M, et al. Prevention of SARS-CoV-2 (COVID-19)  
172 transmission in residential aged care using ultraviolet light (PETRA): a two-arm  
173 crossover randomised controlled trial protocol. *BMC Infect Dis* **2021**; 21(1):1-7.
- 174 5. Morawska L, Cao J. Airborne transmission of SARS-CoV-2: The world should face the  
175 reality. *Environ Int* **2020**; 139: 105730.
- 176 6. Bulfone TC, Malekinejad M, Rutherford GW, Razani N. Outdoor Transmission of  
177 SARS-CoV-2 and Other Respiratory Viruses: A Systematic Review. *J Infect Dis* **2021**;  
178 223(4): 550-61.
- 179 7. Pérez-Lombard L, Ortiz J, Pout C. A review on buildings energy consumption  
180 information. *Energy Build* **2008**; 40(3): 394-8.
- 181 8. Morawska L, Milton DK. It Is Time to Address Airborne Transmission of Coronavirus  
182 Disease 2019 (COVID-19). *Clin Infect Dis* **2020**; 71(9): 2311-3.
- 183 9. Kolarik B, Andersen ZJ, Ibfelt T, Englund EH, Moller E, Brauner EV. Ventilation in  
184 day care centers and sick leave among nursery children. *Indoor Air* **2016**; 26(2): 157-67.
- 185 10. Standards Association of Australia. AS 1668.2-2012: the use of ventilation and air  
186 conditioning in buildings. Part 2. Sydney, NSW: Standards Australia, 2012.
- 187 11. Queensland Health. Other respiratory viruses in residential care facilities. Available at:  
188 [https://www.health.qld.gov.au/public-health/industry-environment/care-  
facilities/prevention/non-influenza-respiratory-viral-illness](https://www.health.qld.gov.au/public-health/industry-environment/care-<br/>189 facilities/prevention/non-influenza-respiratory-viral-illness), Accessed 11 May 2022.
- 190 12. European Centre for Disease Prevention and Control. Influenza virus characterisation,  
191 summary Europe, March 2022. Available at: [www.ecdc.europa.eu/en/publications-  
data/influenza-virus-characterisation-summary-europe-march-2022](http://www.ecdc.europa.eu/en/publications-<br/>192 data/influenza-virus-characterisation-summary-europe-march-2022), Accessed 11 May  
193 2022.

- 194 13. Stabile L, Pacitto A, Mikszewski A, Morawska L, Buonanno G. Ventilation procedures  
195 to minimize the airborne transmission of viruses in classrooms. *Build Environ* **2021**; 202:  
196 108042.
- 197 14. Prill R. 2000. Why measure CO<sub>2</sub> inside buildings?  
198 [www.energy.wsu.edu/documents/co2inbuildings.pdf](http://www.energy.wsu.edu/documents/co2inbuildings.pdf)

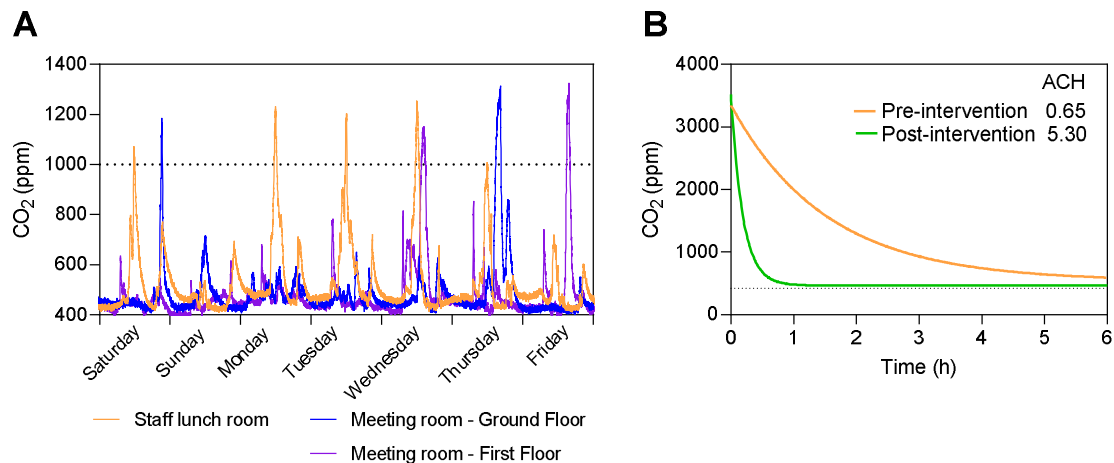

199

200 **Figure 1:** A) CO<sub>2</sub> peaks over a one-week period for the identified high risk transmission  
201 zones. B) CO<sub>2</sub> decay curve for the staff lunch room before (orange) and after (green)  
202 extraction fan installation. Air changes per hour (ACH) calculated by fitting non-linear  
203 regression.

204

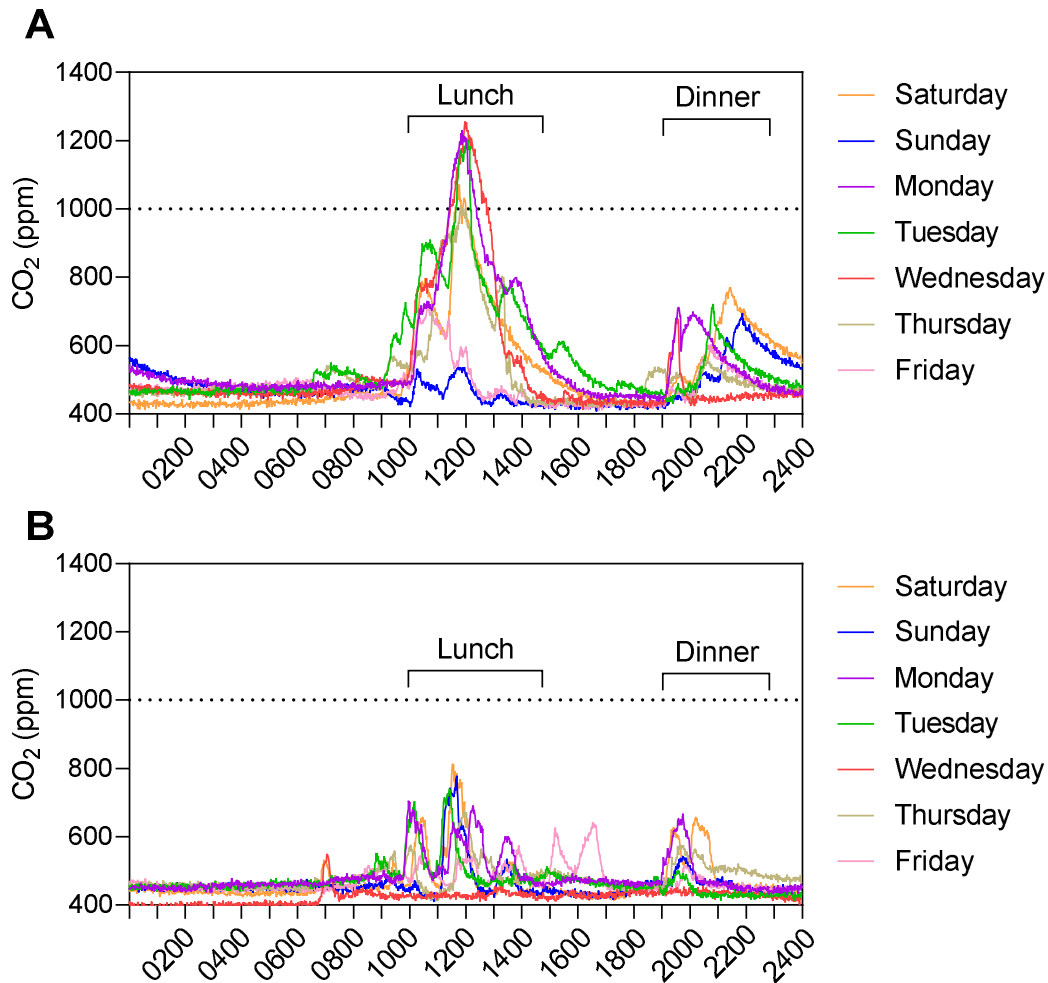

205

206 **Supplementary Figure 1:** CO<sub>2</sub> tracing of a 24 h period in the staff lunch room over the  
207 course of a week. A) Prior to the installation of the extraction fan, showing high prolonged  
208 peaks between 10am-2pm and 7pm-10pm, corresponding with staff lunch and dinner breaks.

209 B) After the installation of the extraction fan, showing reduced peaks.

210
